# Supplementary material for: Ethical Leadership and Knowledge Sharing: The Impacts of Prosocial Motivation and Two Facets of Conscientiousness
Source: Front Psychol. 2020 Nov 9;11:581236. doi: 10.3389/fpsyg.2020.581236 (PMC7680888; doi:10.3389/fpsyg.2020.581236)
Supplement: Supplementary file 1 [file Data_Sheet_1.xlsx]

## Sheet: Sheet1
age	gender	majoring discipline	team	timesize	ethical leadership	knowledge sharing	prosocial motivation	dutifulness	achievement striving
35	0	0	1	2	4.5	5.25	5.6	3.75	3.75
25	1	1	1	2	4.83	6.5	7	3.75	3.75
38	1	1	1	2	5	5.25	6.2	4	3.75
26	0	0	1	2	5.17	5	6	3.75	3.5
23	1	1	2	3	3.83	4.75	4.8	3.75	3.25
26	1	1	2	3	4	6	5.8	3.5	3.5
24	1	1	2	3	4.33	5	6	4.5	3.75
24	1	1	2	3	4.33	4.5	5	4	3.25
23	1	0	2	3	4.67	5.25	6	3.75	3
24	1	1	2	3	4.67	4.75	4.8	3.75	3.5
23	1	0	2	3	4.83	6.5	5	3.75	4.75
24	0	0	2	3	4.83	5.75	6	4	3.5
24	1	1	3	3	4.83	6.5	6.2	2.75	3
26	1	0	3	3	4.83	5	6	4	3.5
21	1	1	3	3	5	5	6	3.5	3.25
23	0	0	3	3	5.17	6.5	6.4	3.5	3
24	1	1	3	3	5.17	7	7	4	3.75
24	1	1	3	3	5.67	6.5	6.6	4.25	4.5
23	1	0	4	4	3	6	7	4	3.5
25	1	0	4	4	3.83	4.75	4.6	2.75	3.75
23	1	1	4	4	4	3.75	4.4	4	3.5
23	1	0	4	4	4	5.25	6	3.75	4.25
24	1	1	4	4	4	5	5.8	4	3.5
22	1	0	4	4	4.17	4.25	5.2	3.5	3
23	1	1	4	4	4.33	4.75	5	3.25	4.5
25	1	0	5	4	4.33	5.75	5.8	3.5	4.25
24	0	1	5	4	4.5	5.75	5.6	4.25	3.75
24	1	0	5	4	4.5	6.25	7	3.5	3.75
26	0	0	5	4	4.67	5.25	6	5	3.25
24	1	0	5	4	5	4.75	5.8	4.25	3.75
25	1	1	5	4	5	5	5.4	3.5	3.5
25	1	1	5	4	5	5	5	4.25	3.75
26	0	1	5	4	5	6.75	5.8	4	4
32	1	0	5	4	5	6	6	3.75	2.75
22	1	1	5	4	5.17	5.75	6.6	4	3.75
23	1	1	6	4	5.17	4.5	6.4	4.5	3.75
23	1	1	6	4	5.17	5.25	6.6	3.75	4
24	0	0	6	4	5.17	6.25	6.4	4.25	4.5
25	0	0	6	4	5.17	5.5	6.6	4	3
25	1	1	6	4	5.17	6	6	3.5	3.25
23	1	1	7	5	3.67	5.25	5	2.75	2
23	1	1	7	5	4	5.5	6.4	3.75	3.75
29	1	0	7	5	4	4.5	5.8	4.25	3.5
27	1	1	7	5	4.17	6.75	6.4	4.25	4
23	0	1	7	5	4.33	4	4	4	4
23	1	1	7	5	4.33	4.5	5	4	3.25
24	0	1	7	5	4.33	4.75	6	4.75	4.25
23	1	0	7	5	4.5	5.75	6	3.5	3.25
23	1	1	7	5	4.5	4.75	6.4	4	3.75
24	0	1	8	5	4.67	5.75	5	4.75	3.75
29	0	1	8	5	4.67	4.25	5.2	3.75	3.5
24	1	1	8	5	4.83	5.25	5.6	4	3
28	0	1	8	5	4.83	5.75	5.4	4.25	3.5
25	1	1	8	5	5	6	6	4	3.5
23	1	1	8	5	5.17	6	7	3.75	3.5
28	0	1	8	5	5.17	6.5	6.6	4	3.5
29	0	0	8	5	5.17	5.5	4	3.75	3.5
27	0	0	8	5	5.67	5.75	6.6	4.75	4.25
23	1	1	8	5	5.83	6.25	6.2	4.5	4.25
24	1	1	9	6	3.5	6	7	4.25	3
21	1	1	9	6	3.67	4.75	5.2	3	2.75
24	1	0	9	6	3.67	4.5	5.2	4	3.25
23	0	0	9	6	3.83	5.25	5.6	4.25	3.75
23	0	0	9	6	3.83	5	5.2	4	3.5
25	1	1	9	6	3.83	5	5	4.25	3.5
21	1	1	9	6	4	5	5.4	4.25	3.75
24	1	1	9	6	4	5.25	5.8	3.25	3.75
27	0	1	10	6	4.33	6	6.4	4.75	4.25
25	1	1	10	6	4.5	4.5	4.4	3.5	3.5
21	1	1	10	6	4.67	5.25	6.8	3.75	3.5
25	0	0	10	6	5	5.25	5.6	3.5	3.5
27	1	1	10	6	5.17	6.5	6.8	4	4
23	1	0	11	7	3	6.75	7	3.25	3
24	0	1	11	7	3.33	5.5	5.2	4	3.75
24	1	0	11	7	3.5	5	5.6	4.75	4
24	1	1	11	7	3.67	5.25	5.8	3.5	3.75
29	0	1	11	7	3.67	4.25	4.2	4.25	3.5
24	0	0	11	7	3.83	5.75	5.8	3.5	2.5
25	0	0	11	7	3.83	5.75	5.6	3.75	3
26	0	0	11	7	4	5	4.4	4.25	3.25
23	1	1	11	7	4.17	5.75	5.8	3.5	2.75
24	0	0	11	7	4.33	4.5	5.4	4.25	3
25	0	0	11	7	4.33	6.25	6.8	3.75	2.75
23	1	0	12	7	4.67	5.75	6.4	3.75	3.25
24	1	0	12	7	4.67	5	5.6	3.75	3.75
23	0	0	12	7	4.83	5.25	5.8	3.5	2.5
25	1	1	12	7	4.83	5.5	6.4	4.25	3.25
23	0	0	12	7	5	4.5	6.6	3.75	3.5
23	0	0	12	7	5	5.5	6.4	4.25	4
24	0	0	12	7	5	6.5	6.2	3.75	3.75
25	0	0	12	7	5	4.75	5.6	3.75	3.75
23	1	0	12	7	5.17	5.5	6.4	3.75	3.25
24	1	0	12	7	5.17	5.75	6.8	3.75	4
23	0	0	12	7	5.67	6.25	7	4.75	3.75
23	0	0	12	7	6	5.75	7	3.75	3.5
23	0	0	13	8	2.83	5.5	5.4	4.5	4
24	0	0	13	8	4.17	6.25	5.6	4.5	3.75
26	0	0	13	8	4.17	5	6	3	3
27	1	1	13	8	4.17	7	7	4.25	3.5
27	1	0	13	8	4.17	6	7	3.25	3
25	1	1	13	8	4.33	6	6	4	3.5
32	0	1	13	8	4.33	6.5	5.6	4	3.5
20	0	1	13	8	4.5	4	4.8	3.25	3
23		0	13	8	4.5	5.25	6.8	4.25	3.5
24	0	0	13	8	4.5	4.75	5	4	3.75
26	1	0	14	8	4.5	6	6.4	3.5	3.25
27	1	0	14	8	4.5	5.5	7	4.25	4.25
23	0	0	14	8	4.67	6.25	6.4	3.5	4
24	1	0	14	8	4.83	5.5	6.2	2.75	3.5
24	0	0	14	8	4.83	6.5	6.2	4	2.75
40	1	1	14	8	4.83	6.5	5.8	3.25	3
26	0	1	14	8	5	6	5.8	4.25	4.5
29	0	1	14	8	5	5.75	6.4	4	3.5
27	0	0	14	8	5.16	5.5	6.6	4	3
25	1	1	15	9	3.33	4.5	5	3.75	3.5
28	0	0	15	9	3.5	5.5	5.4	4.25	3.5
23	1	0	15	9	3.83	4.5	5	4	4
25	1	0	15	9	3.83	5	5.8	3	3.25
29	0	1	15	9	4	5.5	5.6	4.5	4.75
25	0	0	15	9	4.33	4.5	4	4.25	3.5
25	1	0	15	9	4.5	5	5	3.75	3.5
29	0	0	15	9	4.5	7	7	4.25	3.5
31	1	1	15	9	4.5	5	5.6	4	3.5
24	0	0	15	9	4.83	5.5	6.4	2.75	3.25
25	1	1	15	9	4.83	4.5	5.8	3.75	3.25
24	0	0	15	9	5.17	6	6.8	4.75	4
26	0	0	15	9	5.17	5.25	6	3.5	3.5
24	1	0	16	10	3.33	4	4	4	3.75
24	0	0	16	10	3.5	5	5	4.25	3.5
23	1	1	16	10	4	4.75	6	4	3
24	1	0	16	10	4.17	4	5.6	2	2.75
24	1	1	16	10	4.17	4.5	4.8	3.25	3.25
24	1	1	16	10	4.17	4.5	4.8	3.25	3.25
27	1	0	16	10	4.17	5	5.2	4	3.75
25	1	1	16	10	4.33	5.75	5.8	4	3.75
26	0	0	16	10	4.33	4.75	5.8	4	3.75
23	1	0	17	10	4.67	4.75	6	4	3.5
25	0	1	17	10	4.67	5.5	6.4	4.25	4
25	1	0	17	10	4.83	6	7	4.25	3.5
25	1	1	17	10	5	6	6	4	4
24	0	0	17	10	5.17	5.75	4.4	3.75	3.25
29	0	0	17	10	5.17	5.25	7	4	4
23	1	1	17	10	5.33	5.5	6.4	3	3.75
23	1	1	18	11	3.5	4.5	6	4	3.5
24	0	1	18	11	4	3.5	3.8	3	3
24	0	0	18	11	4.17	6.5	6.6	5	4
28	1	0	18	11	4.5	5.75	6.2	4.75	4
24	0	0	18	11	4.83	5.25	6	4.25	3.5
23	1	0	18	11	5	4	7	4.5	4.25
24	1	0	18	11	5.17	6	6	4	3.25
23	0	0	18	11	5.64	7.25	7	4.75	2.75
23	0	0	18	11	5.65	6.75	6.8	5.25	2.5
23	0	0	18	11	5.66	7	7.2	5	2.75
23	0	0	18	11	5.67	7	6.8	5	3
23	0	0	18	11	5.67	7	7.4	5	2.75
23	0	0	19	12	3.67	4.5	4.8	4	3.5
23	0	0	19	12	3.67	4.5	4.8	4.5	3.75
27	1	0	19	12	4	5.5	5.8	3.25	2.5
23	0	0	19	12	4.5	5.5	5	3.75	4
23	1	0	19	12	4.67	4.5	4.8	2.75	2.75
23	1	0	19	12	5	4.25	5.6	3.5	3
25	0	0	19	12	5	6	6	4	4
24	0	0	19	12	5.17	6	4.8	4	3.25
28	1	0	20	13	3.67	4.75	5.4	3.5	3
23	0	0	20	13	4	6	6	3.5	3.75
25	0	0	20	13	4.83	6.25	5.6	5	4
23	1	0	21	14	4.17	5.5	5.4	3	2.5
24	1	0	21	14	4.5	6	6	3.25	2.75
24	0	0	21	14	4.83	4.5	6.2	4.25	3.25
25	1	0	21	14	5.17	5	6	2.75	3.75
26	0	1	22	15	3.83	5.25	5.8	4	3.75
26	0	0	22	15	3.83	4.5	4.8	3.75	3.75
23	0	0	22	15	4.33	6	6	4	3.5
25	1	0	22	15	4.83	4.5	5	3.5	3.5
25	0	0	22	15	5	5	5.6	4	4
22	1	0	22	15	5.17	5.25	6.8	4.25	4
24	0	0	22	15	5.17	6.75	6.6	4.75	3.75
28	1	1	22	15	5.17	5.25	6.8	4.25	3.75
23	0	0	22	15	5.5	6.25	5.8	3.5	3.5
23	0	0	23	16	3.3	5.5	4.4	3.75	3.75
24	0	0	23	16	3.31	5.45	4.6	4	4.25
24	0	0	23	16	3.33	5.55	4.8	3.75	4
25	1	0	23	16	3.83	4	4.6	4	3.5
23	1	0	23	16	4.33	4.75	5	4	3.25
24	0	0	23	16	4.33	5.5	6	3.75	3.25
24	0	0	24	16	4.5	5.5	6.2	3.75	3.5
23	1	0	24	16	5.17	4.75	5.4	3.5	3.25
24	0	1	24	16	5.17	6.25	6.4	4.25	3.5
24	1	1	24	16	5.17	5.5	5.8	3.5	2.75
25	1	0	24	16	5.17	6	7	3.5	3.5
23	0	0	24	16	3.83	5.25	5.8	4.5	3.25
23	0	0	24	16	3.17	7	7	4.75	4
23	0	0	25	20	3	6	5.4	4	3.5
24	1	1	25	20	3.67	5.5	5.2	4.25	4
31	1	0	25	20	3.67	5	5	2.25	2.5
23	0	0	25	20	4	4.5	5.6	4.5	3.75
25	0	1	25	20	4	5.5	5	3	3.75
29	0	0	25	20	4.33	6	6.2	4	3.5
24	1	1	25	20	4.5	4.75	5.2	4.25	3.5
24	1	1	25	20	4.83	5.75	6	3.5	2.5
24	1	0	25	20	5	5.25	5.8	4.25	3.75
25	1	1	26	20	5	6	6	4.75	3.5
23	0	0	26	20	5.17	6.5	7	4.5	3.25
23	0	0	26	20	5.17	6.5	7	4.5	3.25
23	0	0	26	20	5.17	6.25	5	4.25	4.25
23	1	0	26	20	5.5	6.5	6.4	3.75	4
23	0	0	26	20	6	6.25	6.8	4.25	4.5
23	1	0	27	22	3.21	3.25	5	3	1.77
23	1	0	27	22	4.33	6.5	6.6	4.25	3.5
23	1	0	27	22	4.67	5.75	5.6	4.75	3.5
23	0	0	27	22	3.33	4.25	2.4	2	3
24	1	0	27	22	3.66	6.25	6.8	3.75	3
24	1	0	27	22	3.67	6	6.8	3.5	3
25	1	0	27	22	3.67	6.25	6.6	3.75	3.25
25	1	0	27	22	4.33	6.25	6.8	4	3
34	0	0	27	22	4.33	6	6.4	3.75	3.5
23	0	0	28	25	4	5	5	3.25	3.25
23	0	0	28	25	3.67	5	4.6	3.75	3.25
27	0	0	28	25	3.83	5.25	6	4.5	4.25
26	0	0	28	25	5.33	6.25	6.2	4	4.5
24	0	0	29	26	3.5	7	6.6	4.75	4
24	1	0	29	26	4.17	4.25	6	3.75	3.25
28	0	0	29	26	4.17	5.5	5.4	4.25	3.25
26	0	0	29	26	4.33	5.5	5.6	4.5	3.5
31	1	0	29	26	4.33	4.75	6.6	3	3.25
24	0	0	29	26	4.5	4.5	5.6	3.75	3.75
23	0	0	29	26	4.67	5.5	5.4	4	4
24	1	0	29	26	5	6	5.6	3.5	3.25
26	0	0	29	26	5	5	5	4	3.5
24	0	0	29	26	6	7	7	4.5	4.5
24	0	0	30	29	5.17	6	5.8	4	4.75
25	1	1	30	29	3.5	4.5	5.4	2.5	3.5
25	0	0	30	28	4.33	5.5	6	3.25	2.75
24	0	0	30	29	2.5	6	6	4.25	3.5
23	0	0	30	29	4.5	5.5	6.2	4	3.5
30	1	1	31	30	2.83	5.5	4.8	3.25	3.25
26	0	0	31	30	3.33	6	4.6	2.75	2.5
23	1	0	31	30	3.67	4	4	3.5	3
24	1	0	31	30	3.67	4.75	5.2	3.75	4
24	0	0	31	30	3.83	5.25	5.8	3.5	4
23	0	1	31	30	4	4	4	3	3
23	0	0	31	30	4.5	5	6.4	4.5	3.75
24	0	0	31	30	4.5	5.25	6.8	4	3.5
25	1	1	31	30	4.5	5.75	6.4	4	3.5
23	0	0	31	30	4.82	7	7	4.5	3
23	0	0	31	30	4.83	6.75	6.4	4.5	4
23	1	1	31	30	5.17	6.75	6.4	4.5	3.75
24	0	0	31	30	5.5	3.25	4.4	3.75	4.25
25	0	0	32	35	4.17	5.25	5.4	3.25	3.5
24	0	0	32	35	4.5	6	6	4	3.5
24	0	0	32	35	4.5	4.75	5.8	4	3
24	1	0	32	35	4	5	5	3.75	3.75
24	0	0	32	35	5	6.25	6.2	3.25	3.5
23	1	0	32	35	4.67	5	5.4	4.25	3
24	0	0	32	35	5	6	5.4	3.25	3.25
24	0	0	33	40	3.17	5	4.2	3.75	3.25
24	0	1	33	40	3.83	7	7	5	4
24	0	0	33	40	4	5.25	5	4	4.75
23	0	0	33	40	4.17	5	5	3.25	3.5
24	1	1	33	40	4.33	5	5.6	3.5	3
23	1	1	34	43	3.67	5.5	5.8	3	3.25
22	0	0	34	43	4.83	5.75	6	3.5	3.5
24	1	1	34	43	3.83	6	5.8	4	4
24	0	0	35	50	3.67	5	5	4.25	3.5
24	0	0	35	50	4.33	5.25	6.6	3.75	3.75
35	0	0	35	50	4.33	6.25	6.2	3.5	4
25	1	0	35	50	4.5	4.75	5.6	3.25	2.75
24	0	0	35	50	5.5	6.5	6.8	4.25	3.75
24	1	1	35	50	6	7	7	4.25	3.75
23	1	0	36	60	3.15	4.75	4.2	4	4
24	1	0	36	60	3.17	5	4.4	3	4
24	1	0	36	60	3.19	4.5	4.6	3.5	4
26	0	0	36	60	4.17	4.5	5.2	4	4.5
24	1	0	36	60	4.33	5.5	5.6	4.5	3.5
24	1	0	36	60	4.33	5.25	6	4	3
24	0	0	36	60	4.67	5.5	5.6	4.25	3
25	1	0	37	70	3.33	4.75	5	3.5	3.75
24	1	1	37	70	4.5	5.75	6	4	3.5
24	0	0	37	70	5	5.75	6	4	3.75
23	1	1	37	70	5.17	5.5	6.6	3.75	3.5
24	1	0	37	70	5.17	6	6	4.25	3.5
24	1	1	38	100	4	4	4	3.75	4
23	0	0	38	100	4.5	6	5.6	4	3
25	1	0	38	100	3.5	4	4.4	3.25	3.5
24	1	0	38	100	3.67	5.25	6	4.25	2.75
25	0	0	38	100	4.14	5	4.6	2.5	3.73
24	0	0	38	100	4.17	5	5	4	3.75
25	1	0	38	100	4.17	5.75	6	4.25	4.25
25	0	0	38	100	4.23	5	4.5	2.35	3.74
25	0	0	38	100	4.26	5	4.4	2.45	3.75
23	1	0	38	100	4.5	5.5	5.8	3.75	3.25
23	1	0	38	100	4.77	4	4	2.25	2.5
24	1	0	38	100	4.83	4	5	2.25	3
24	0	0	38	100	4.83	6	6.6	3.75	3.5
24	0	0	38	100	4.83	5	5.8	4	3.5
25	1	0	38	100	4.85	5	4	2.75	4
24	1	0	38	100	4.9	4	4	2.25	3
23	0	1	38	100	5	6.5	7	3.75	3.25
25	1	0	38	100	5.5	5.25	6	4.25	3.5
25	0	0	38	100	3.5	5	5.2	3.5	3
23	0	0	38	100	5	6.75	6	4	3.5
23	0	0	38	100	4	5.5	4.8	3.25	3.75
